# Supplementary material
Source: Springer Nature journal article supplement (https://www.springermedizin.de/resource/supplementary/12886_2010_192_MOESM2_ESM.pdf/9473506)
Supplement: MOESM2 [file 9473506]

Day -1

Glaucoma patients scheduled for phaco-trabeculectomy

- Baseline examination (routine examination for any scheduled patient)

Day 0

Surgery (phaco-trabeculectomy)

Day 1

- Eligibility assessment
- Consent
- Study inclusion
- Allocation to treatment or placebo group
- Baseline Tests (Slit lamp photography, flare meter measurement)
- Start of treatment

|         | Treatment | Examinations |           |       |          |           |
|---------|-----------|--------------|-----------|-------|----------|-----------|
|         |           | IOP          | Slit lamp | Photo | AC Flare | Interview |
| Day 1   | x         | x            | x         | x     | x        | x         |
| Week 1  | x         | x            | x         | x     | x        | x         |
| Week 2  | x         | x            | x         | x     | x        | x         |
| Week 3  | x         | x            | x         | x     | x        | x         |
| Month 1 | x         | x            | x         | x     | x        | x         |
| Month 3 |           | x            | x         | x     | x        | x         |
| Month 6 |           | x            | x         | x     | x        | x         |
